# Supplementary material for: Enhanced sulfamethoxazole degradation in soil by immobilized sulfamethoxazole-degrading microbes on bagasse
Source: Royal Society of Chemistry journal article supplement (doi:10.1039/c7ra10150c), 2017-01-01
Supplement: c7ra10150c1.pdf [file c7ra10150c1.pdf]

### Electronic Supporting Information

Standard curve of SMX:

Prepare standard solutions of SMX at the concentrations of 10, 20, 30, 40 and 50 mg L<sup>-1</sup>. Use HPLC to measure these standard concentrations of SMX to obtain the peak area. On the basis of the peak area and corresponding concentrations of SMX, the standard curve of SMX can be drawn (Figure S1).

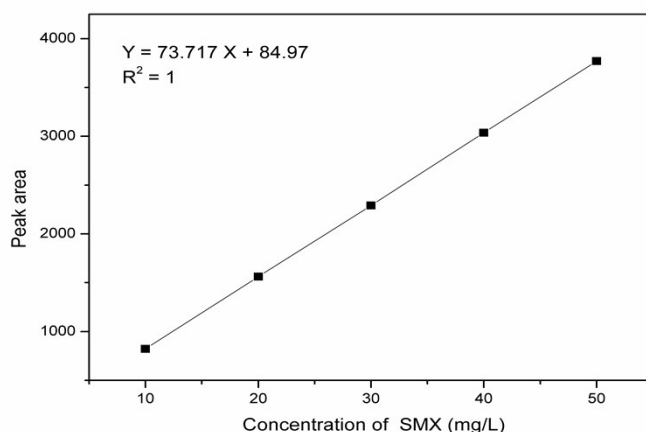

Figure S1 Standard curve of SMX

Table S1 SMX-degrading strains and their corresponding biodegradability ability

| Strain                                 | Taxa      | Degradation rate | Optimal degradation temperature |
|----------------------------------------|-----------|------------------|---------------------------------|
| <i>Phanerochaete chrysosporium</i>     | Fungi     | 74 %             | 35 °C                           |
| <i>Achromobacter denitrificans</i> PR1 | Bacterium | 99.1 %           | 30 °C                           |
| <i>Pseudomonas psychrophila</i> HA-4   | Bacterium | 34.3 %           | 10-15 °C                        |
| <i>Rhodococcus rhodochrous</i>         | Bacterium | 20 %             | 26 °C                           |
| <i>Bjerkandera adusta</i>              | Fungi     | 64-80 %          | 22 ± 2 °C                       |

As shown in Table S1, there are various SMX-degrading strains, some of which demonstrate high biodegradability of SMX. But most biodegradation experiments are conducted in a water environment. Accelerating research of SMX degradation in the soil environment is a priority.

The UPLC-Q-TOF spectra of proposed SMX biodegradation metabolites can be seen in the following figures.

| Compound Label     | <i>m/z</i> | RT | Mass      |
|--------------------|------------|----|-----------|
| Cpd 15: C6 H7 N O2 | 126.0549   | 1  | 125.04761 |

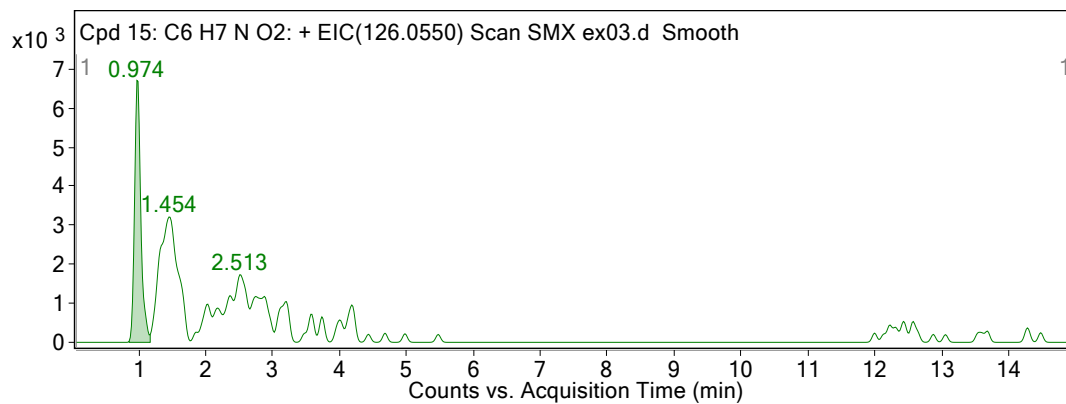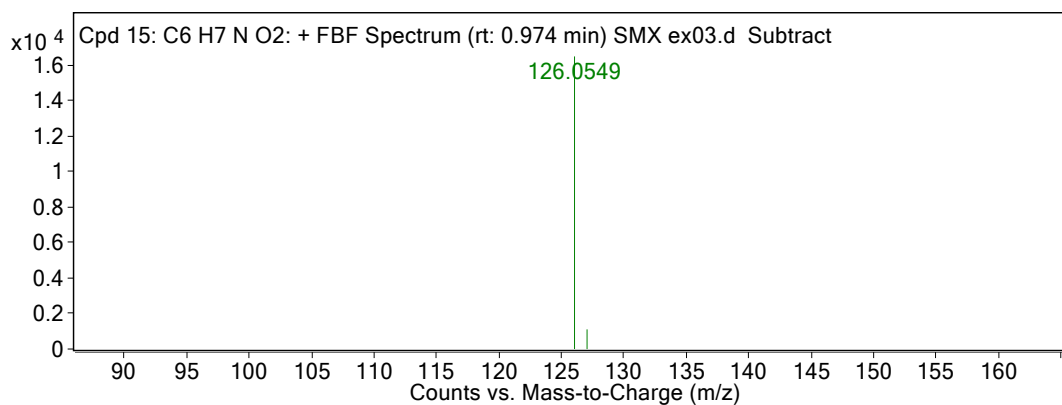

| Compound Label     | <i>m/z</i> | RT | Mass      |
|--------------------|------------|----|-----------|
| Cpd 18: C8 H9 N O2 | 152.0706   | 1  | 151.06324 |

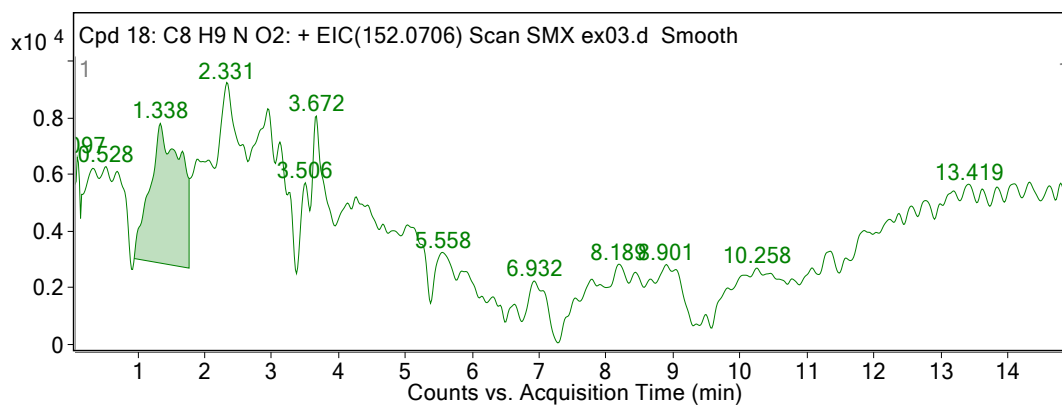

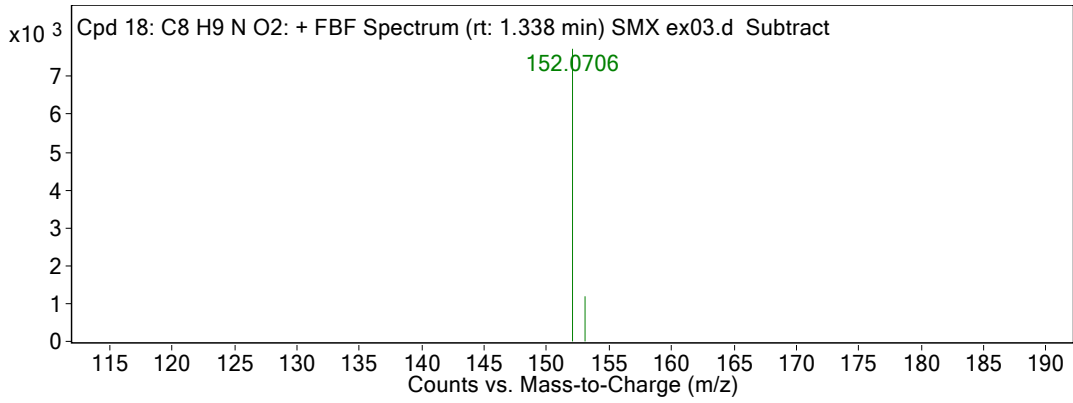

| Compound Label                                                             | <i>m/z</i> | RT | Mass      |
|----------------------------------------------------------------------------|------------|----|-----------|
| Cpd 14: C <sub>11</sub> H <sub>13</sub> N <sub>3</sub> O <sub>3</sub><br>S | 268.0749   | 3  | 267.06768 |

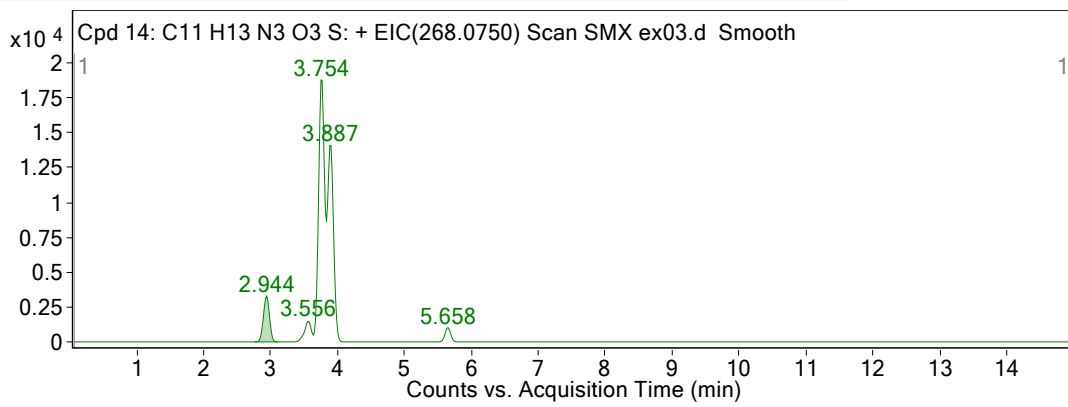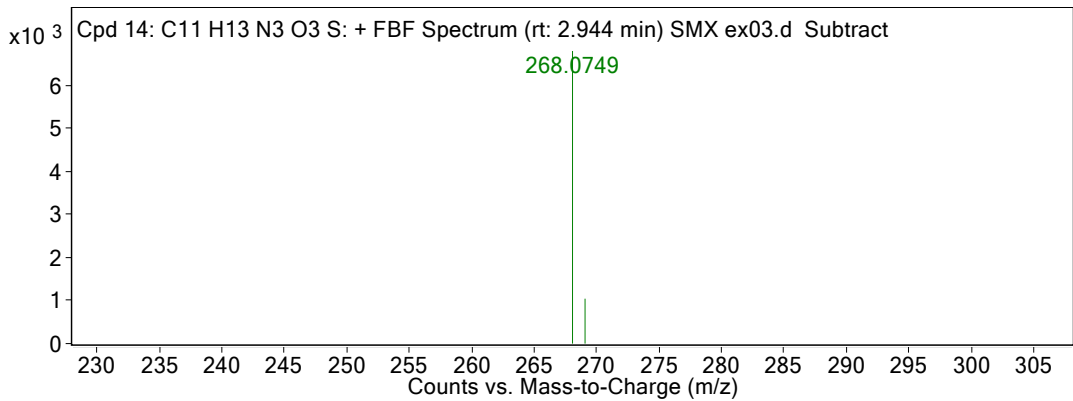

| Compound Label                                       | <i>m/z</i> | RT | Mass      |
|------------------------------------------------------|------------|----|-----------|
| Cpd 43: C <sub>8</sub> H <sub>8</sub> O <sub>2</sub> | 137.0595   | 3  | 136.05211 |

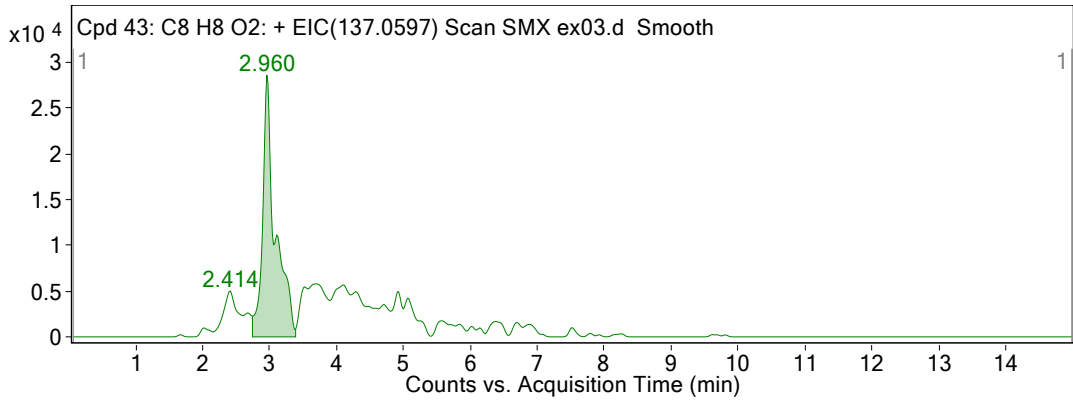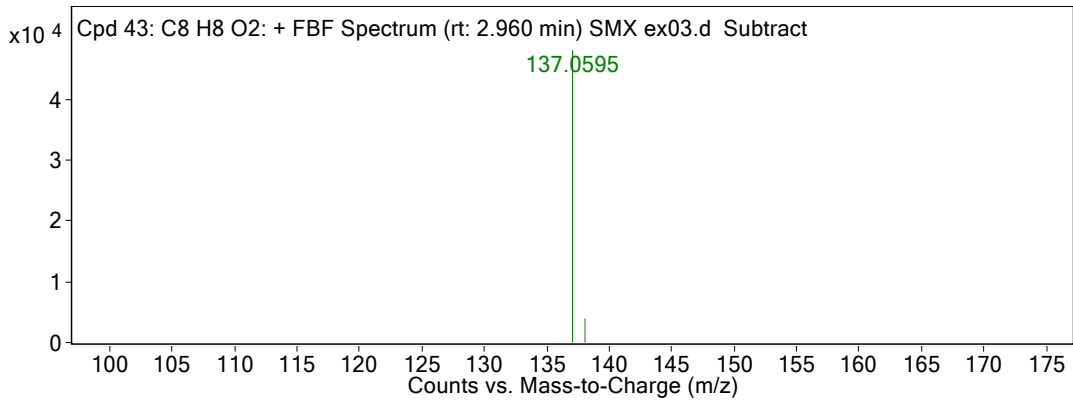

| Compound Label                                       | <i>m/z</i> | RT | Mass      |
|------------------------------------------------------|------------|----|-----------|
| Cpd 24: C <sub>6</sub> H <sub>6</sub> O <sub>2</sub> | 111.0441   | 3  | 110.03676 |

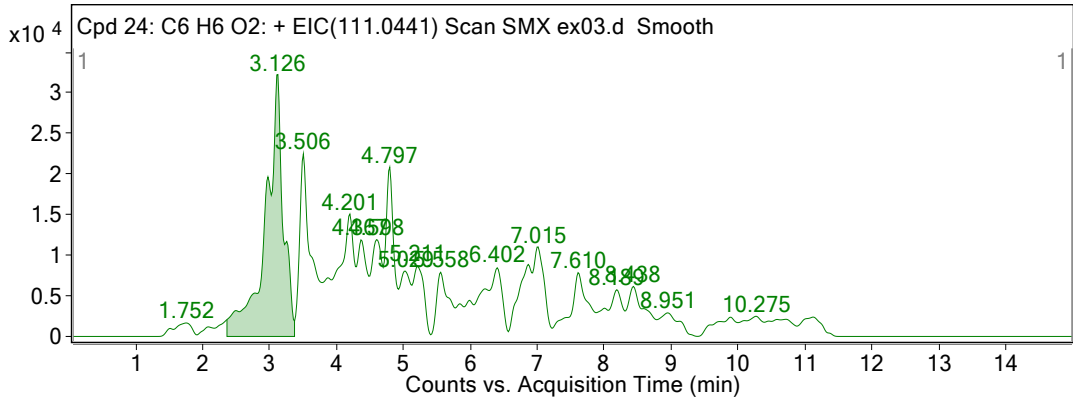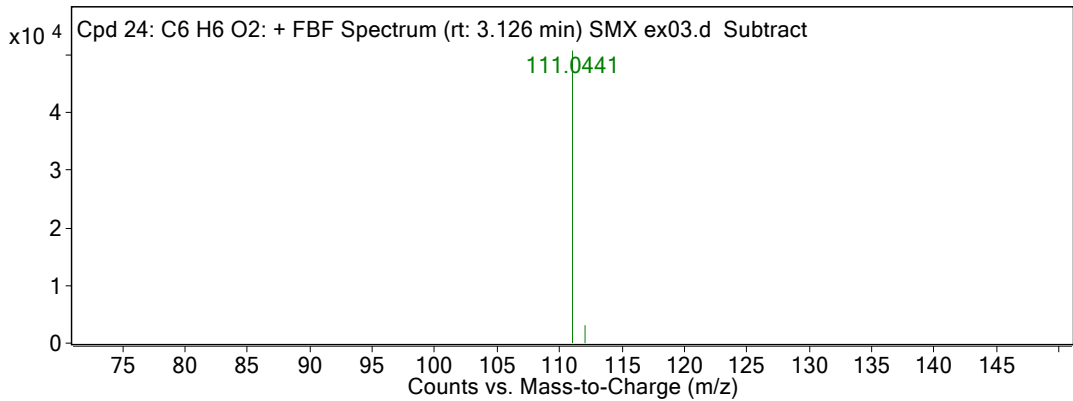

| Compound Label                            | <i>m/z</i> | RT | Mass      |
|-------------------------------------------|------------|----|-----------|
| Cpd 16: C <sub>8</sub> H <sub>9</sub> N O | 136.0757   | 3  | 135.06764 |

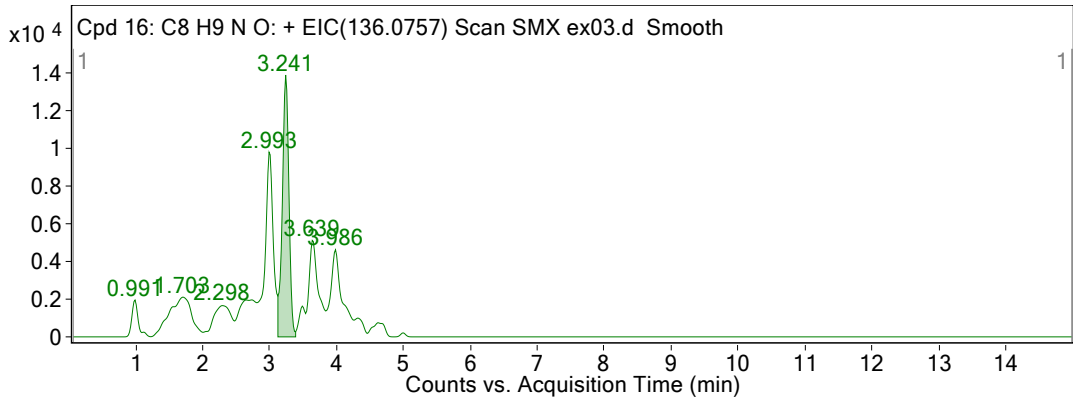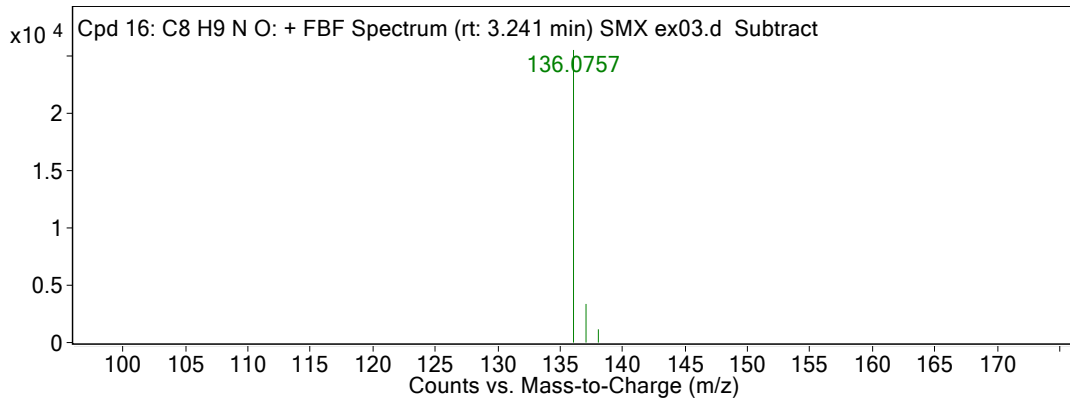

| Compound Label                                                            | <i>m/z</i> | RT | Mass      |
|---------------------------------------------------------------------------|------------|----|-----------|
| Cpd 9: C <sub>10</sub> H <sub>12</sub> N <sub>2</sub> O <sub>4</sub><br>S | 257.0594   | 3  | 256.05198 |

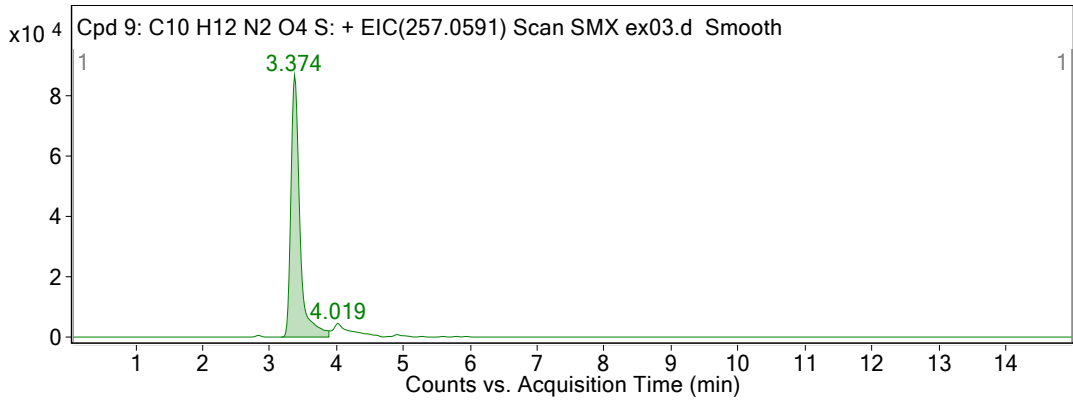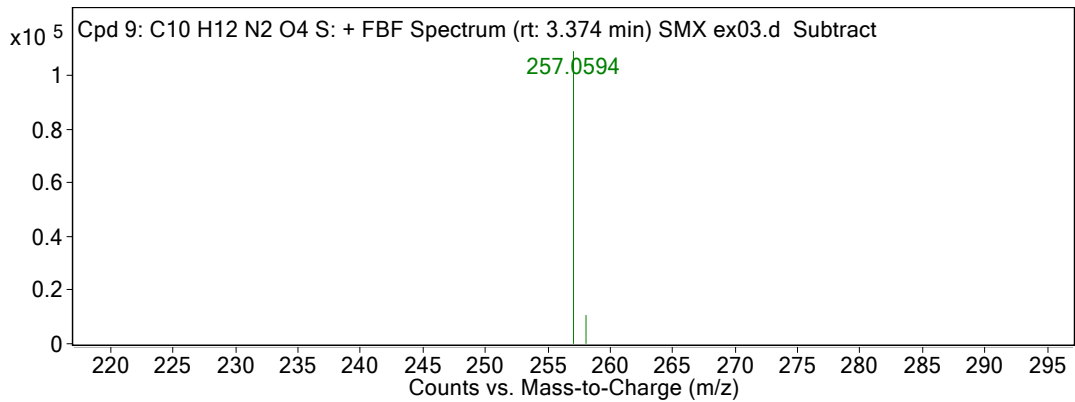

| Compound Label | <i>m/z</i> | RT | Mass |
|----------------|------------|----|------|
|----------------|------------|----|------|

|                      |          |   |           |
|----------------------|----------|---|-----------|
| Cpd 11: C10 H11 N3 O | 190.0975 | 3 | 189.09031 |
|----------------------|----------|---|-----------|

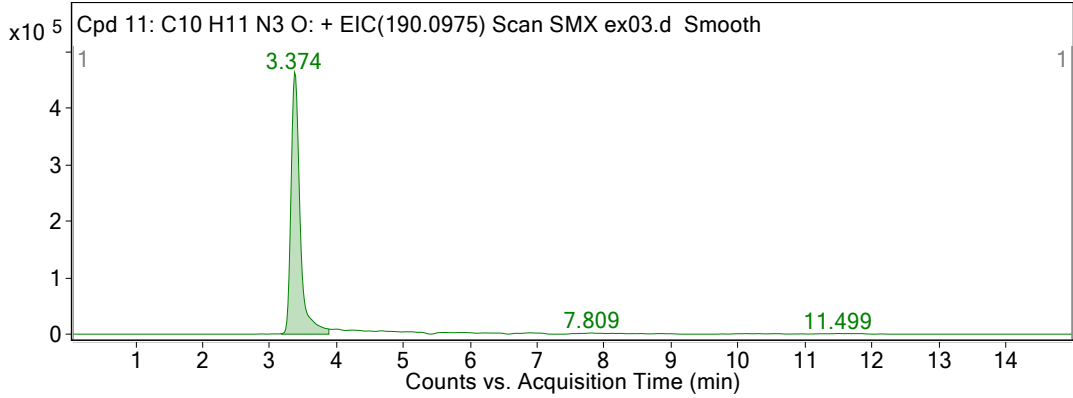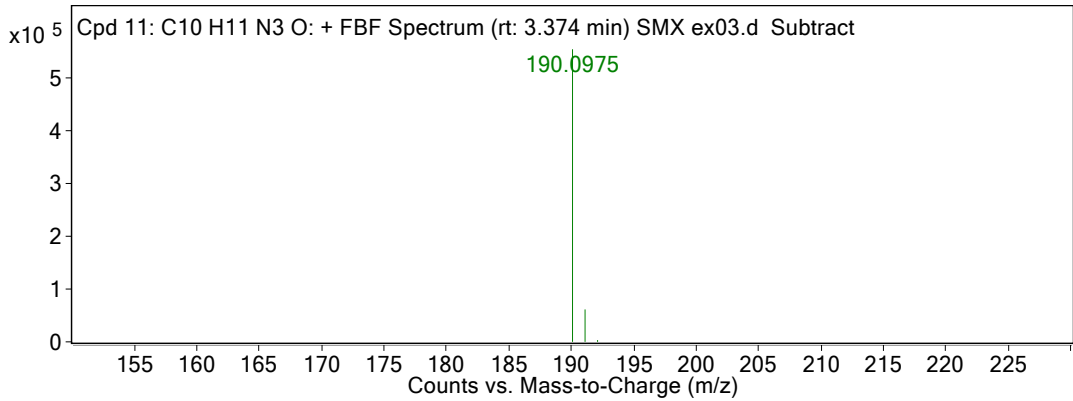

| Compound Label         | m/z      | RT | Mass      |
|------------------------|----------|----|-----------|
| Cpd 6: C10 H11 N3 O3 S | 254.0606 | 3  | 253.05315 |

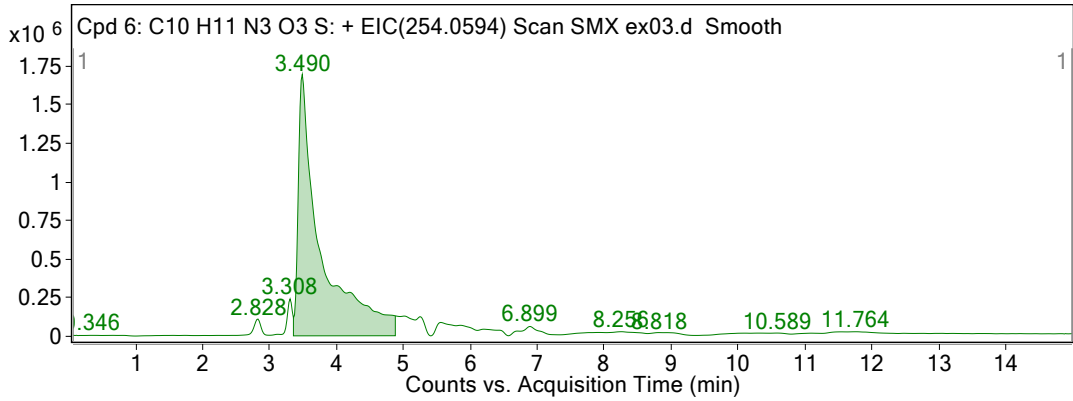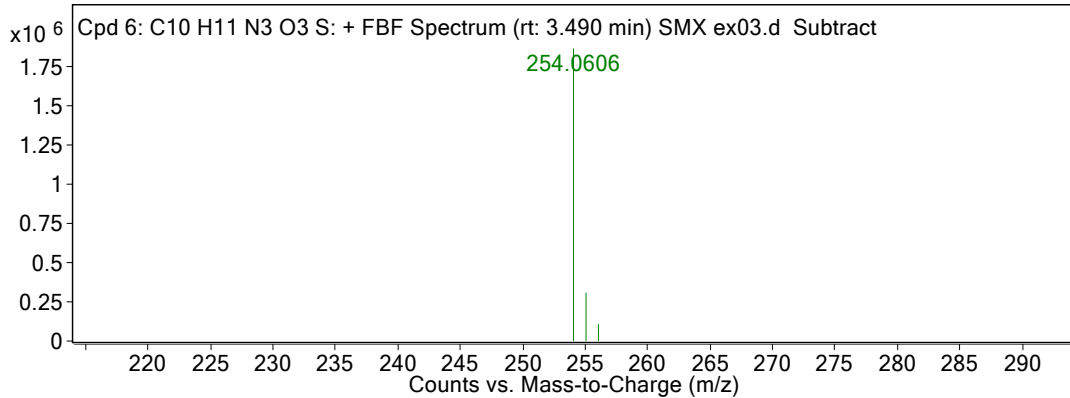

| Compound Label   | <i>m/z</i> | RT    | Mass      |
|------------------|------------|-------|-----------|
| Cpd 23: C6 H6 O2 | 111.044    | 3.506 | 110.03672 |

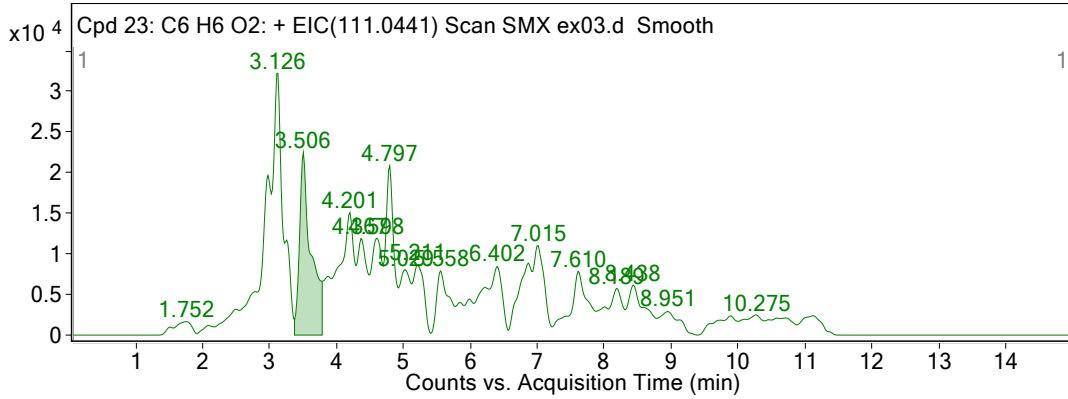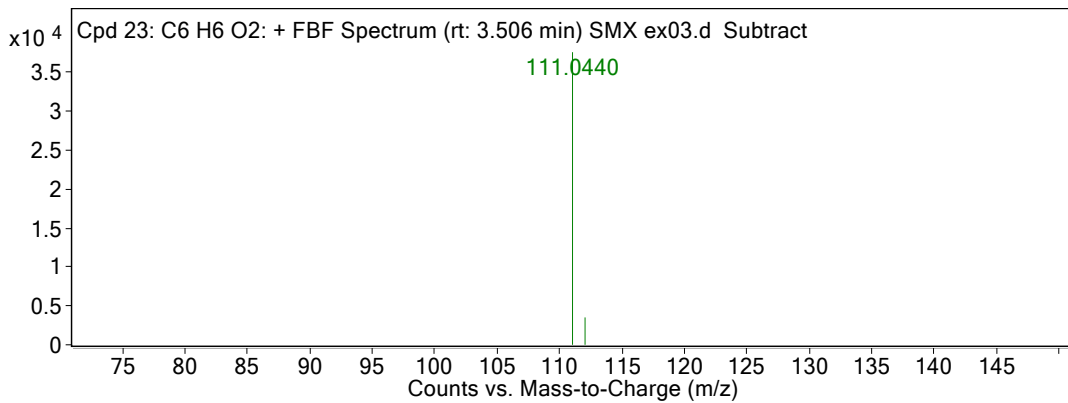

| Compound Label             | <i>m/z</i> | RT | Mass      |
|----------------------------|------------|----|-----------|
| Cpd 13: C11 H13 N3<br>O3 S | 268.0753   | 4  | 267.06794 |

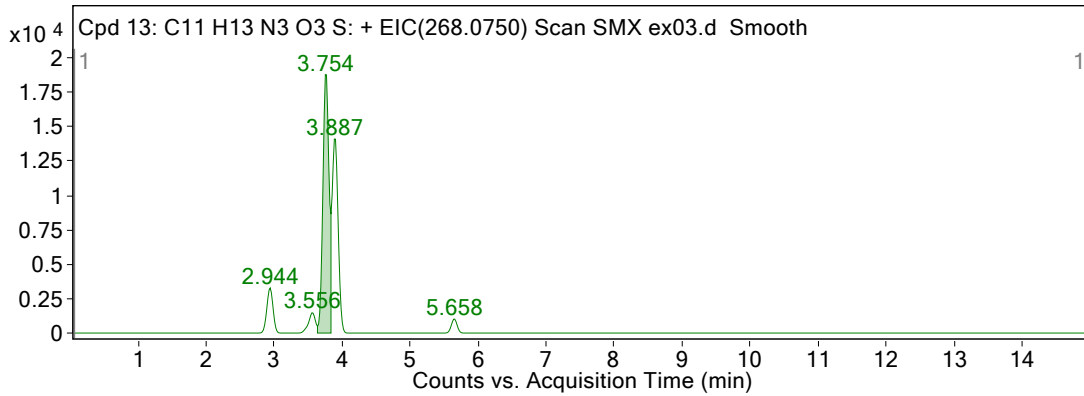

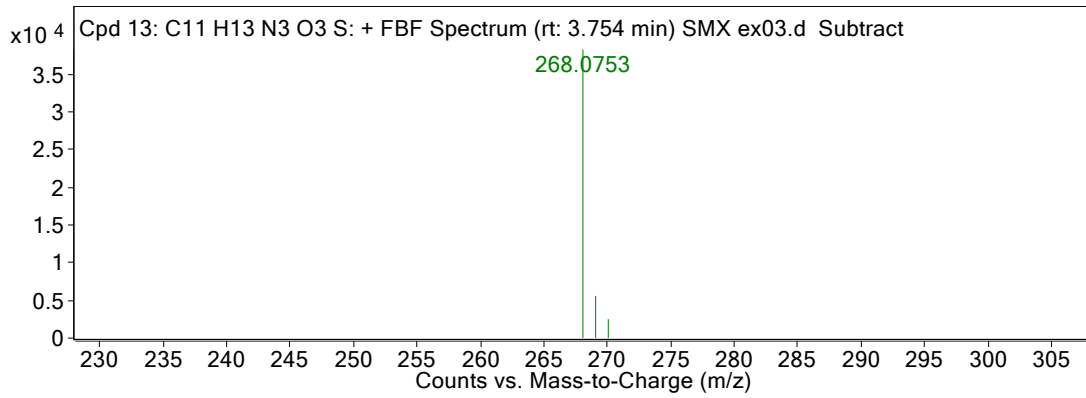

| Compound Label                                                          | <i>m/z</i> | RT | Mass      |
|-------------------------------------------------------------------------|------------|----|-----------|
| Cpd 12: C <sub>11</sub> H <sub>13</sub> N <sub>3</sub> O <sub>3</sub> S | 268.0751   | 4  | 267.06781 |

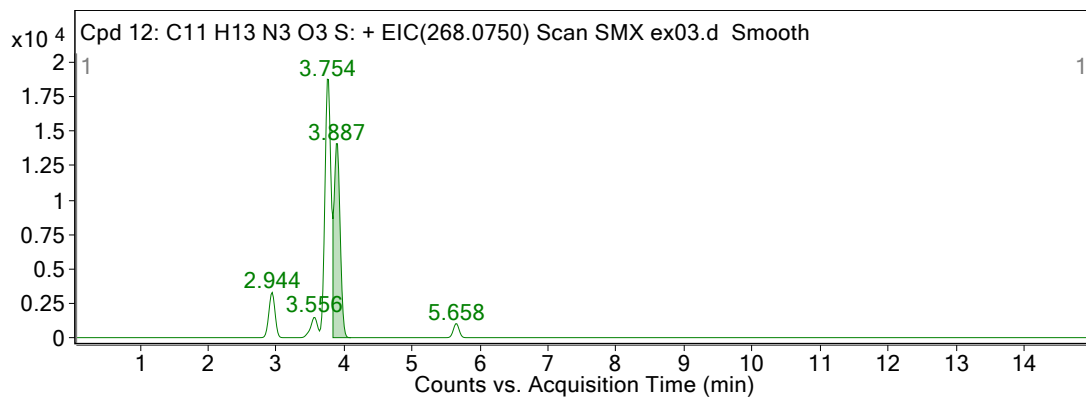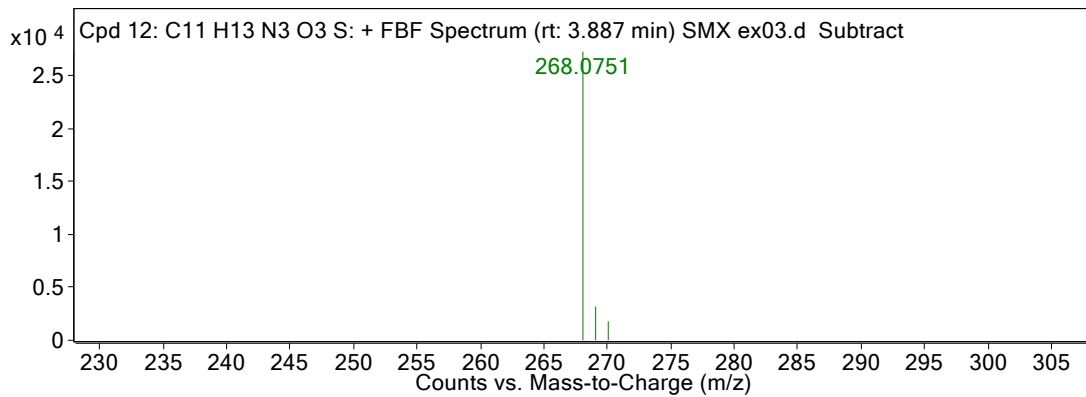

| Compound Label                                       | <i>m/z</i> | RT | Mass      |
|------------------------------------------------------|------------|----|-----------|
| Cpd 44: C <sub>7</sub> H <sub>6</sub> O <sub>2</sub> | 123.0441   | 4  | 122.03684 |



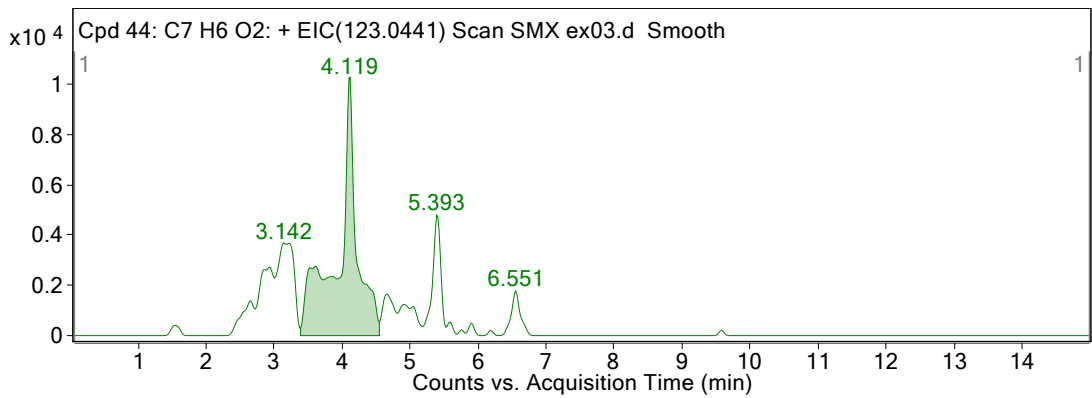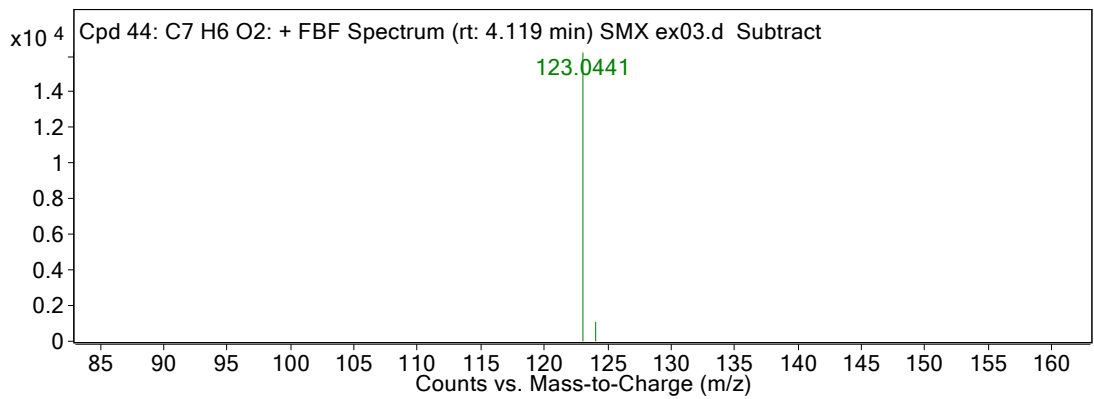

| Compound Label   | $m/z$    | RT | Mass      |
|------------------|----------|----|-----------|
| Cpd 22: C6 H6 O2 | 111.0442 | 4  | 110.03689 |

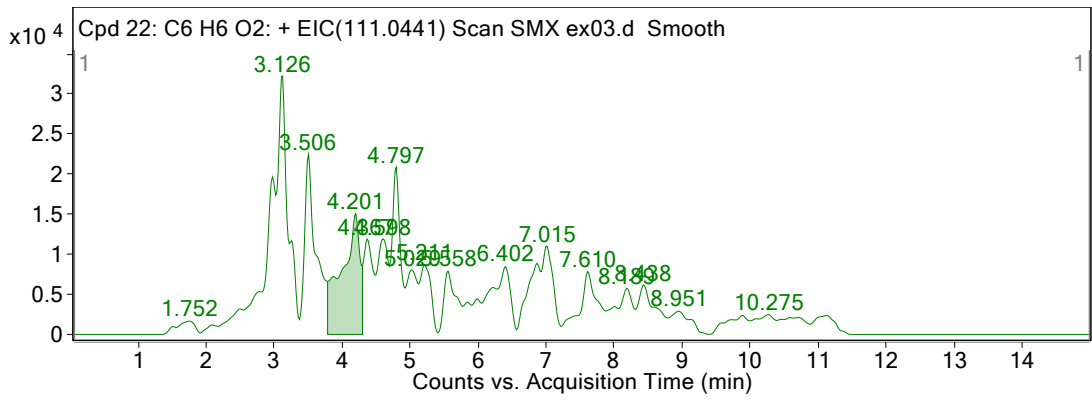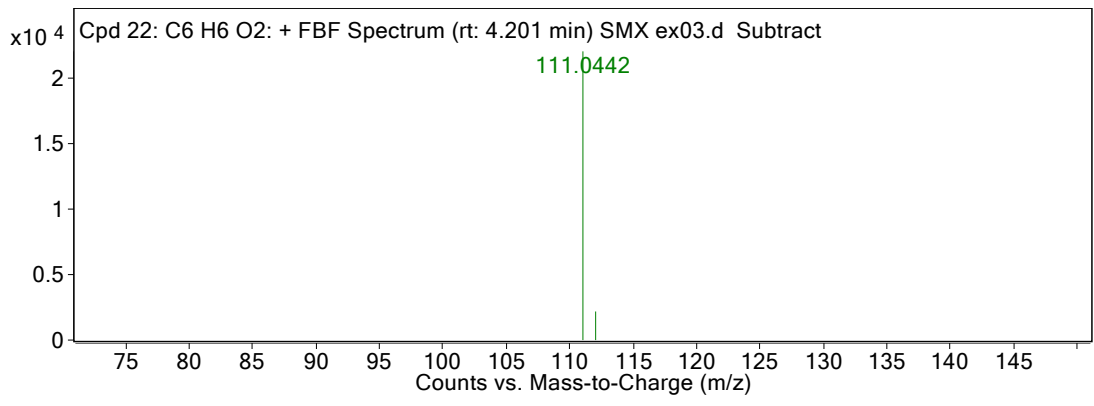

| Compound Label   | <i>m/z</i> | RT | Mass      |
|------------------|------------|----|-----------|
| Cpd 21: C6 H6 O2 | 111.0439   | 4  | 110.03668 |

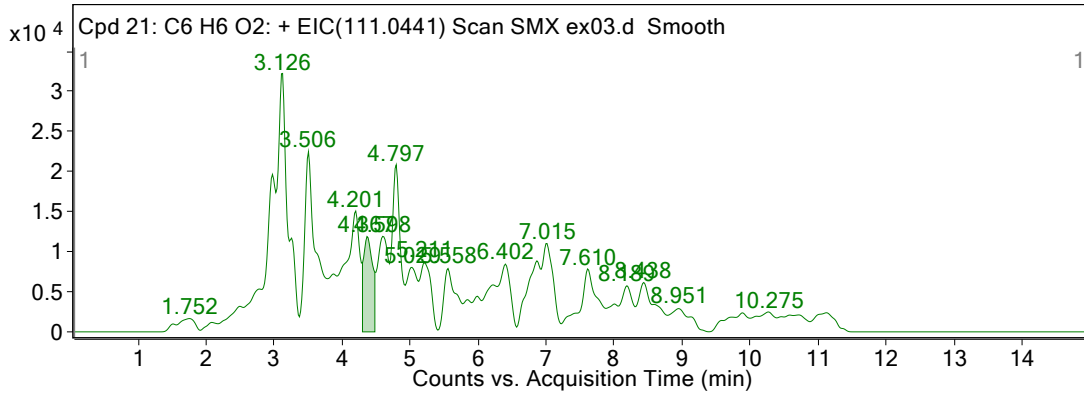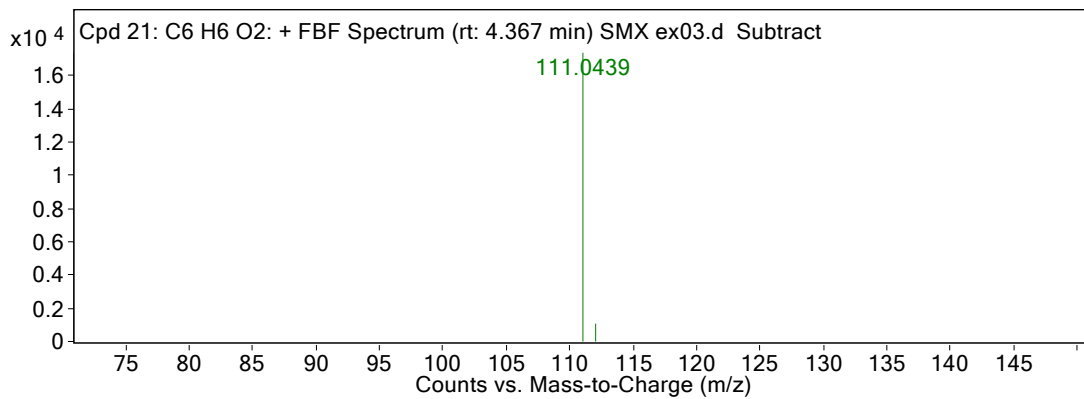

| Compound Label   | <i>m/z</i> | RT | Mass      |
|------------------|------------|----|-----------|
| Cpd 20: C6 H6 O2 | 111.0441   | 5  | 110.03684 |

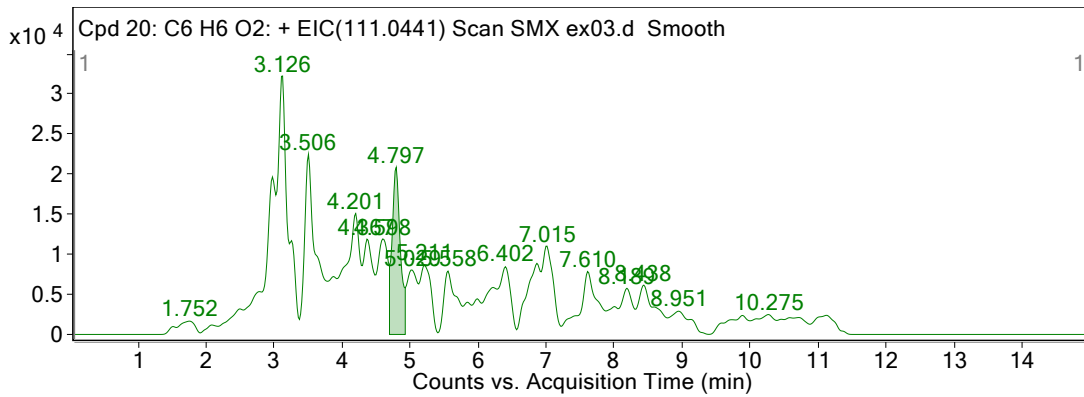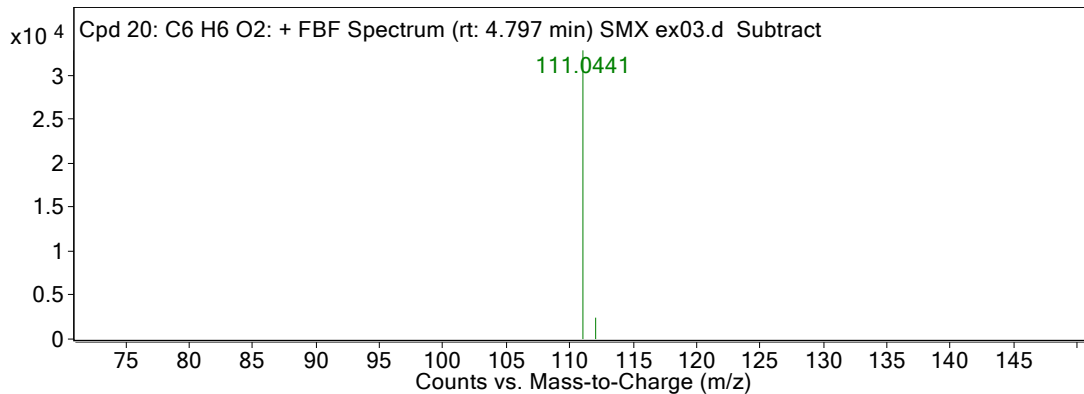

| Compound Label   | <i>m/z</i> | RT | Mass     |
|------------------|------------|----|----------|
| Cpd 25: C5 H6 O3 | 115.0389   | 6  | 114.0316 |

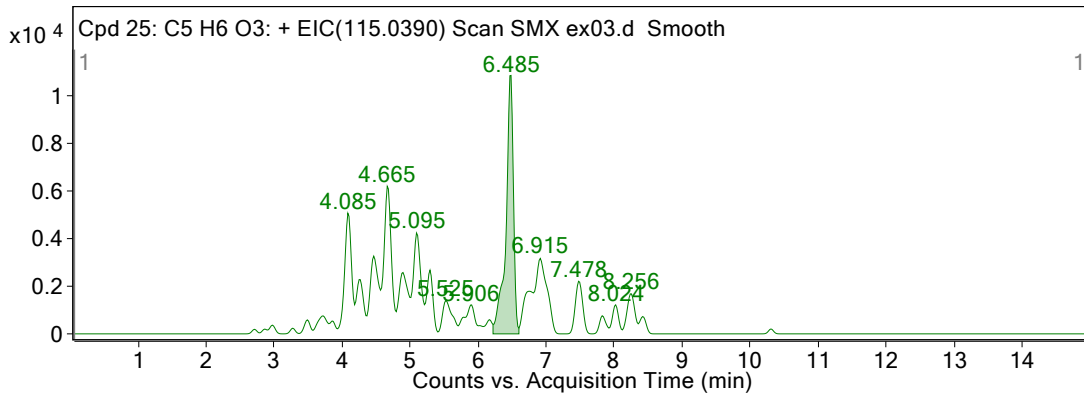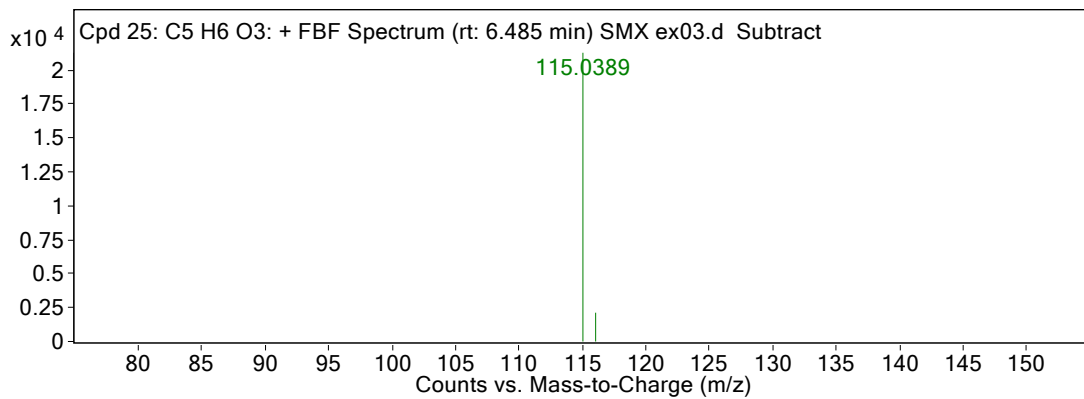

| Compound Label   | <i>m/z</i> | RT   | Mass      |
|------------------|------------|------|-----------|
| Cpd 19: C6 H6 O2 | 111.044    | 7.61 | 110.03674 |

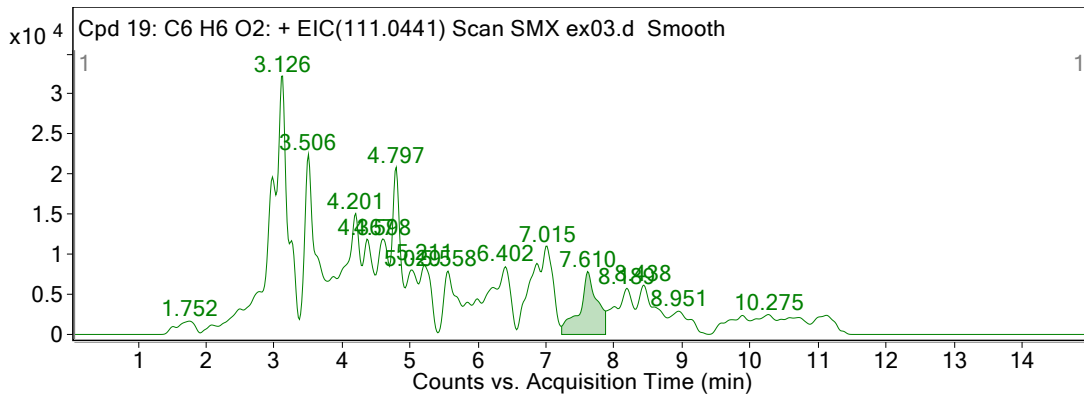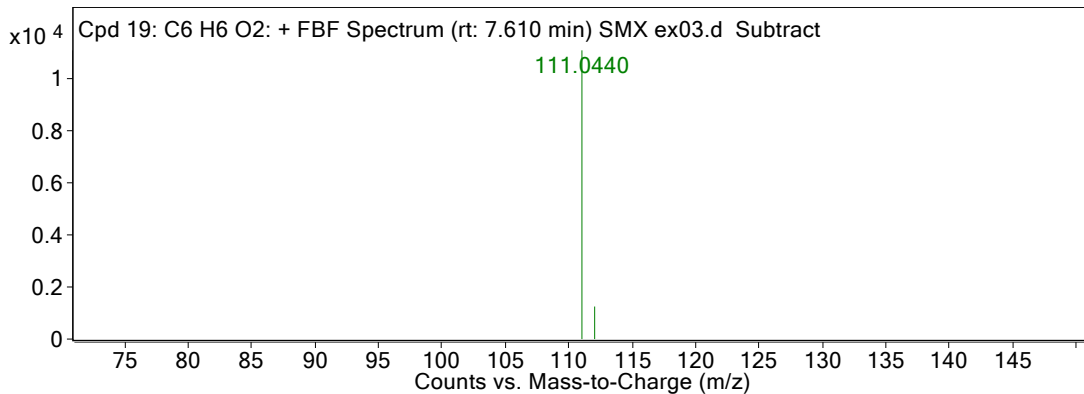

| Compound Label    | <i>m/z</i> | RT    | Algorithm       | Mass      |
|-------------------|------------|-------|-----------------|-----------|
| Cpd 9: C6 H7 N O2 | 126.055    | 1.074 | Find By Formula | 125.04764 |

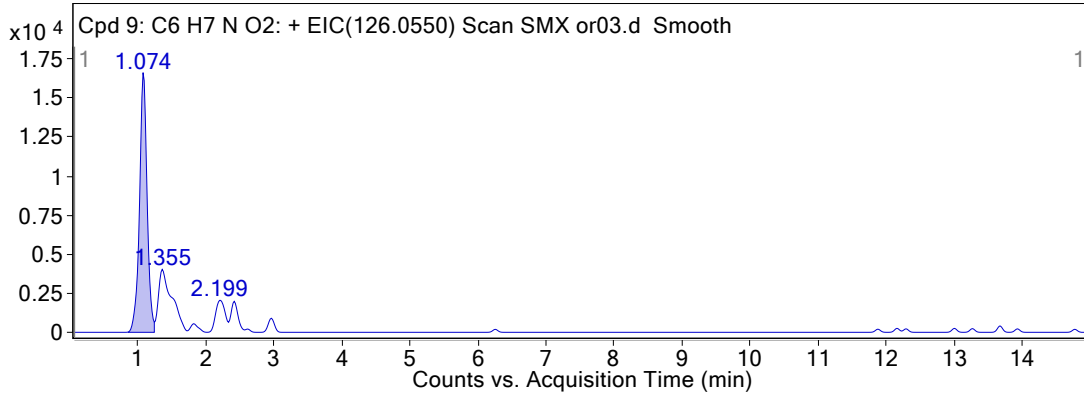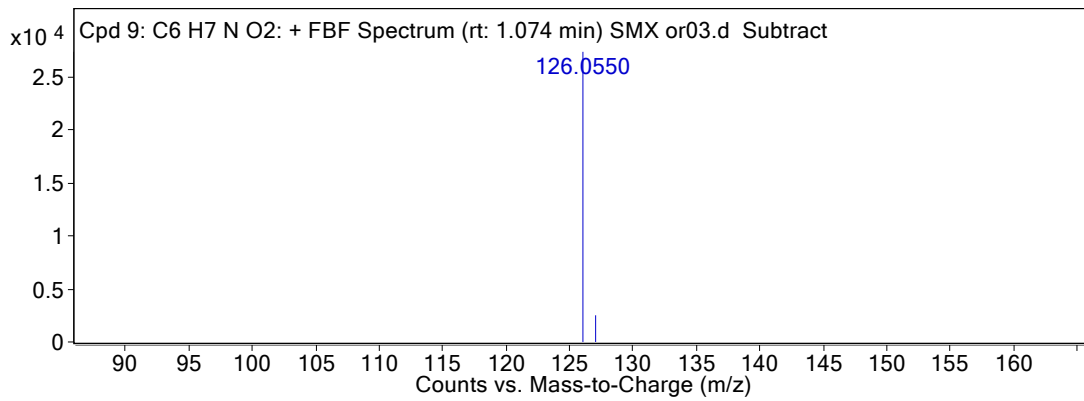

| Compound Label     | <i>m/z</i> | RT    | Algorithm       | Mass      |
|--------------------|------------|-------|-----------------|-----------|
| Cpd 12: C8 H9 N O2 | 152.0704   | 1.339 | Find By Formula | 151.06321 |

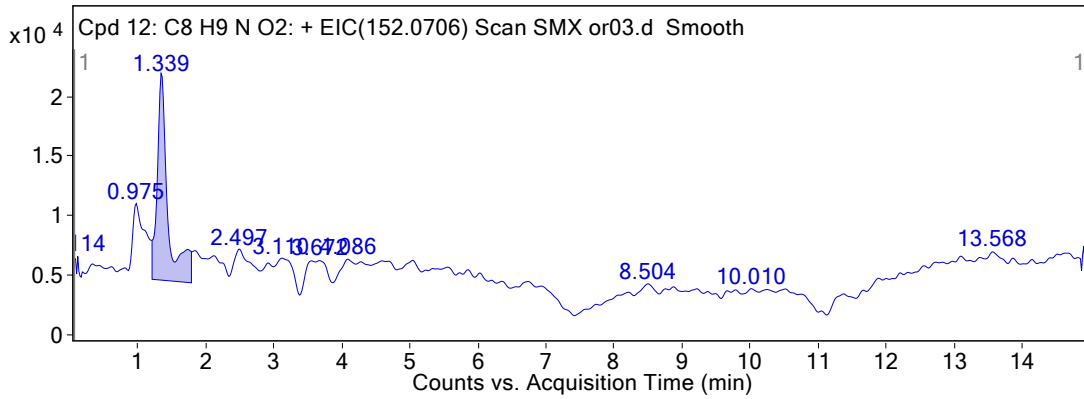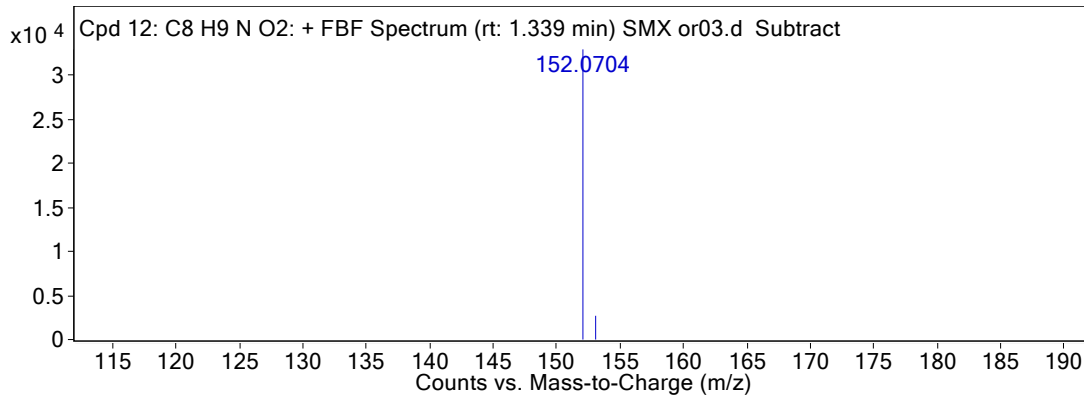

| Compound Label    | <i>m/z</i> | RT    | Algorithm       | Mass      |
|-------------------|------------|-------|-----------------|-----------|
| Cpd 11: C8 H9 N O | 136.0755   | 1.355 | Find By Formula | 135.06826 |

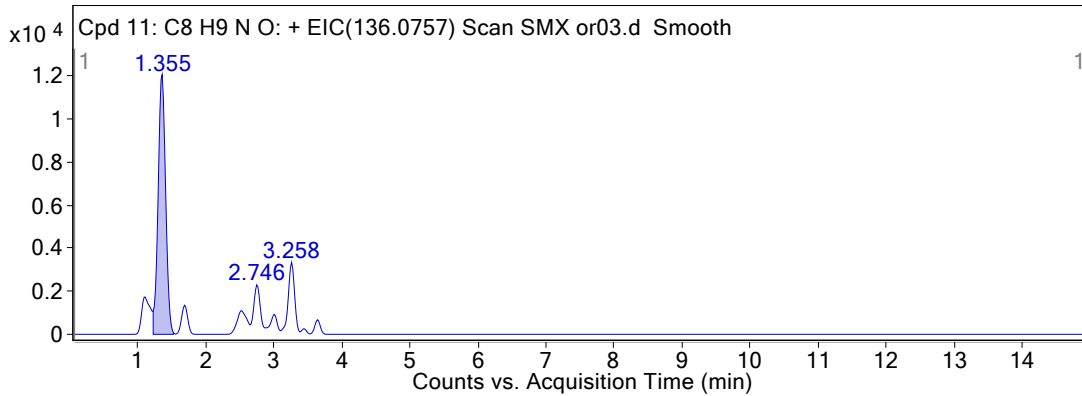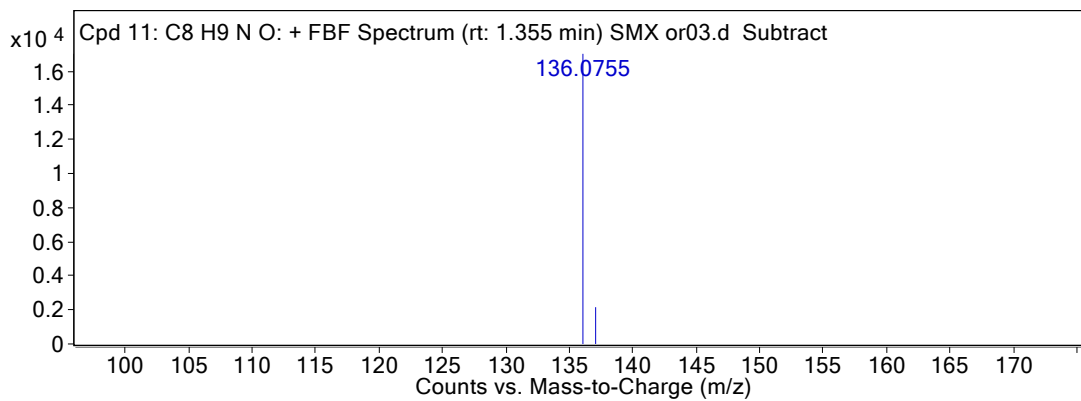

| Compound Label    | <i>m/z</i> | RT    | Algorithm       | Mass     |
|-------------------|------------|-------|-----------------|----------|
| Cpd 10: C8 H9 N O | 136.0756   | 3.258 | Find By Formula | 135.0684 |

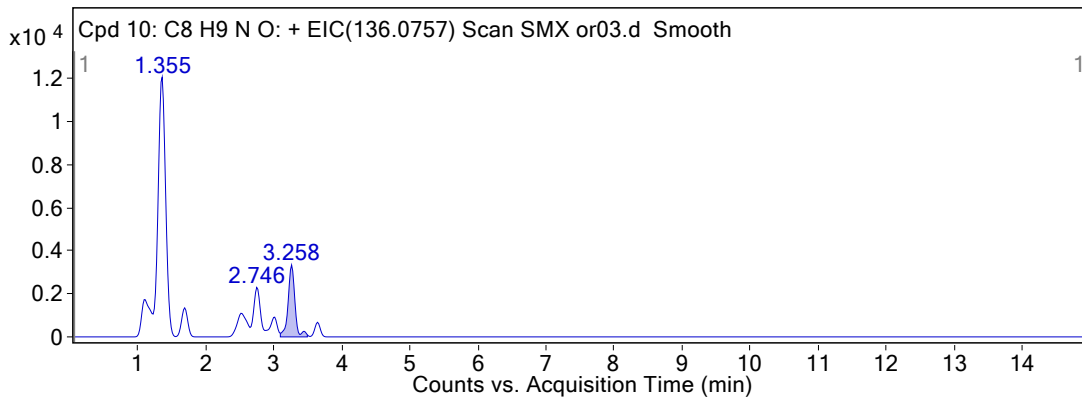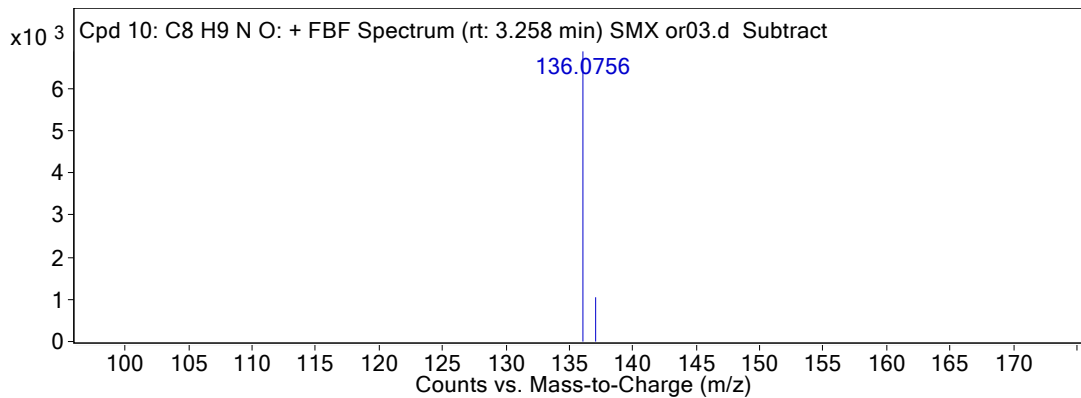

| Compound Label         | <i>m/z</i> | RT    | Algorithm       | Mass      |
|------------------------|------------|-------|-----------------|-----------|
| Cpd 5: C10 H12 N2 O4 S | 257.0596   | 3.391 | Find By Formula | 256.05214 |

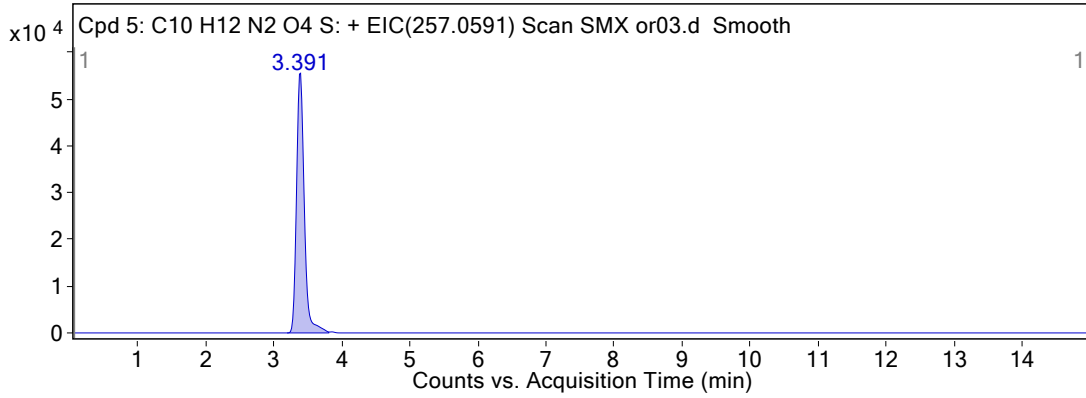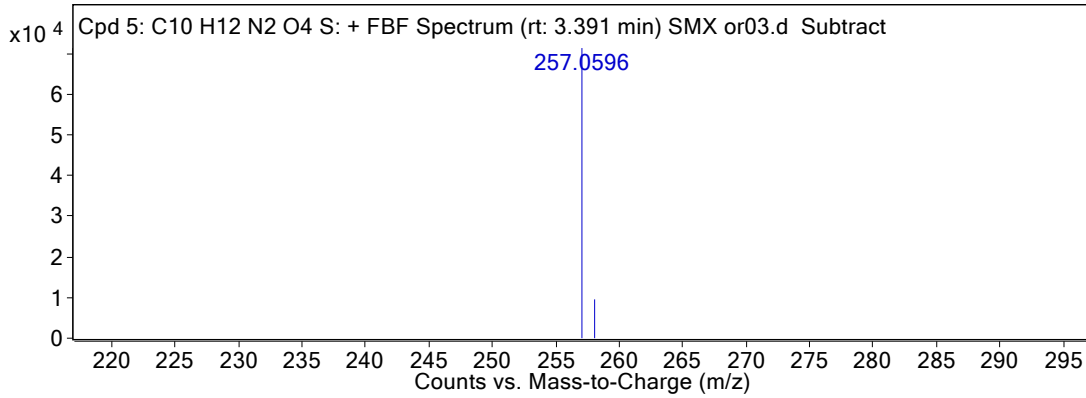

| Compound Label      | <i>m/z</i> | RT    | Algorithm       | Mass      |
|---------------------|------------|-------|-----------------|-----------|
| Cpd 8: C10 H11 N3 O | 190.0977   | 3.391 | Find By Formula | 189.09044 |

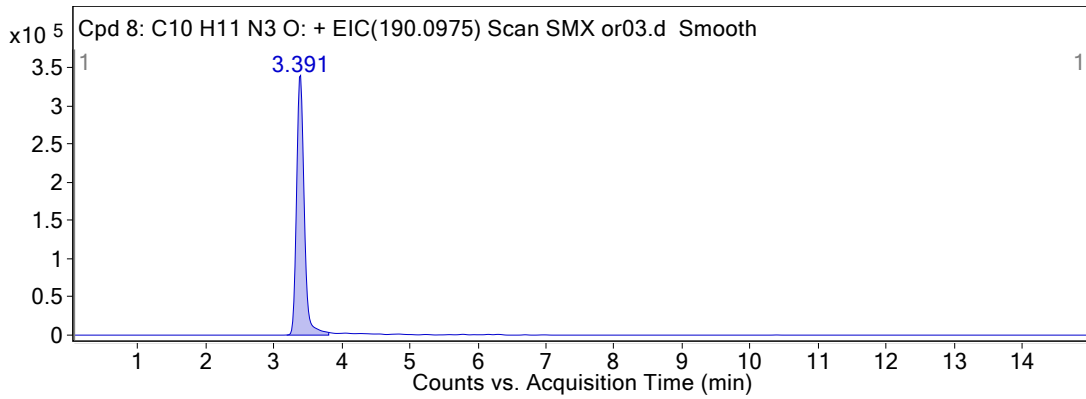

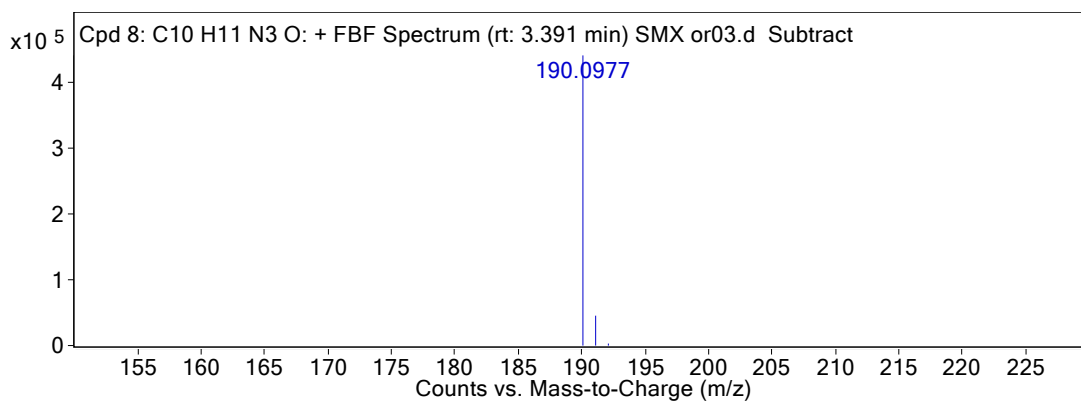

| Compound Label                                                            | <i>m/z</i> | RT    | Algorithm       | Mass      |
|---------------------------------------------------------------------------|------------|-------|-----------------|-----------|
| Cpd 2: C <sub>10</sub> H <sub>11</sub> N <sub>3</sub> O <sub>3</sub><br>S | 254.0605   | 3.457 | Find By Formula | 253.05304 |

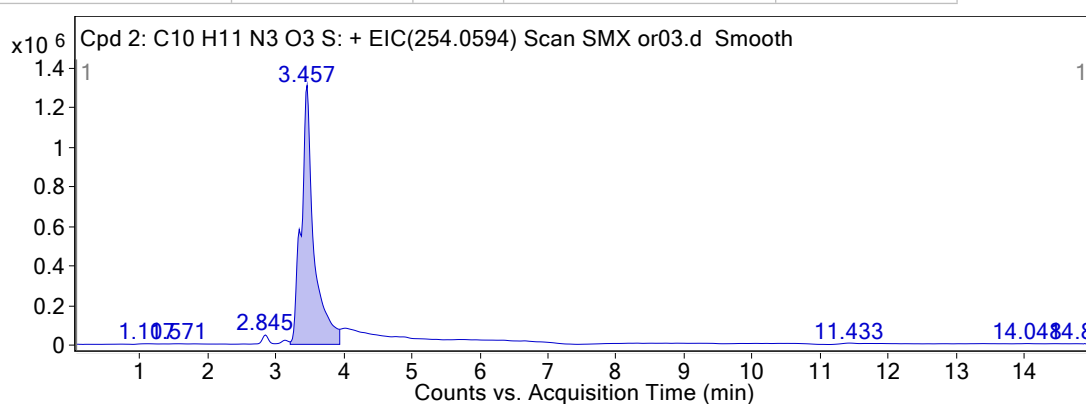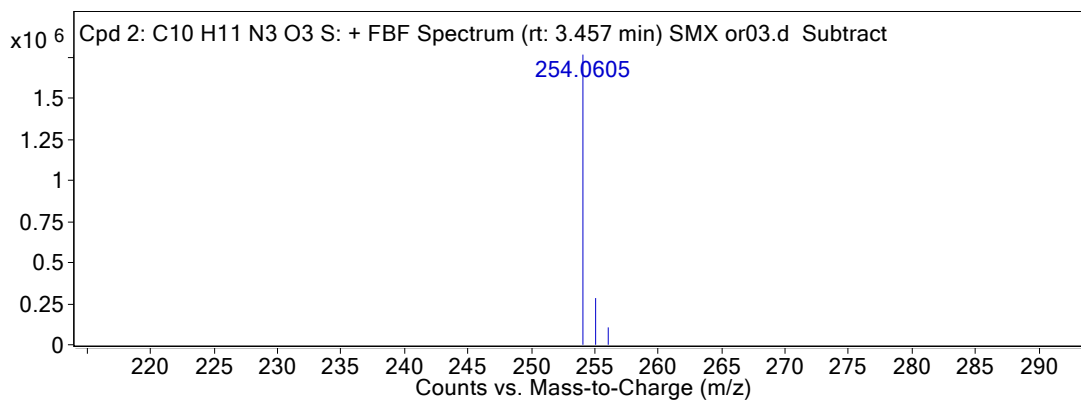

| Compound Label                                                            | <i>m/z</i> | RT    | Algorithm       | Mass      |
|---------------------------------------------------------------------------|------------|-------|-----------------|-----------|
| Cpd 7: C <sub>12</sub> H <sub>13</sub> N <sub>3</sub> O <sub>4</sub><br>S | 296.07     | 3.639 | Find By Formula | 295.06275 |

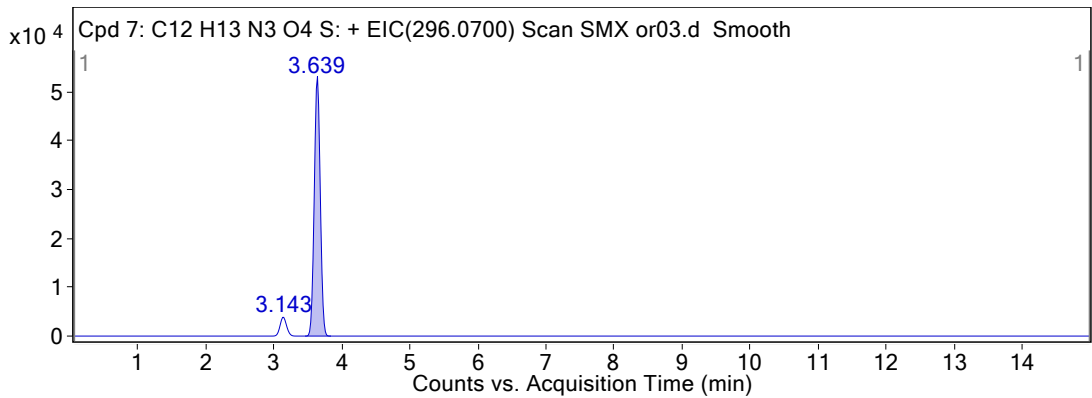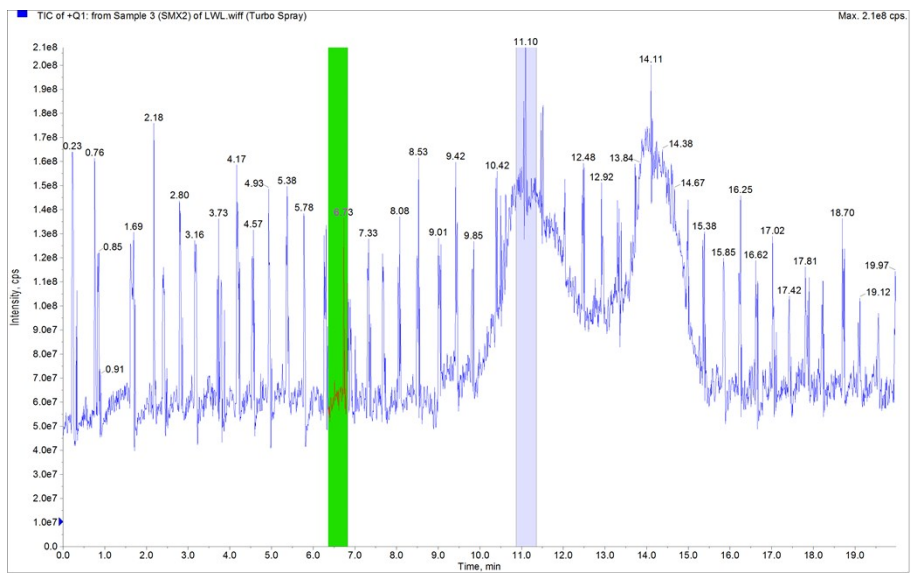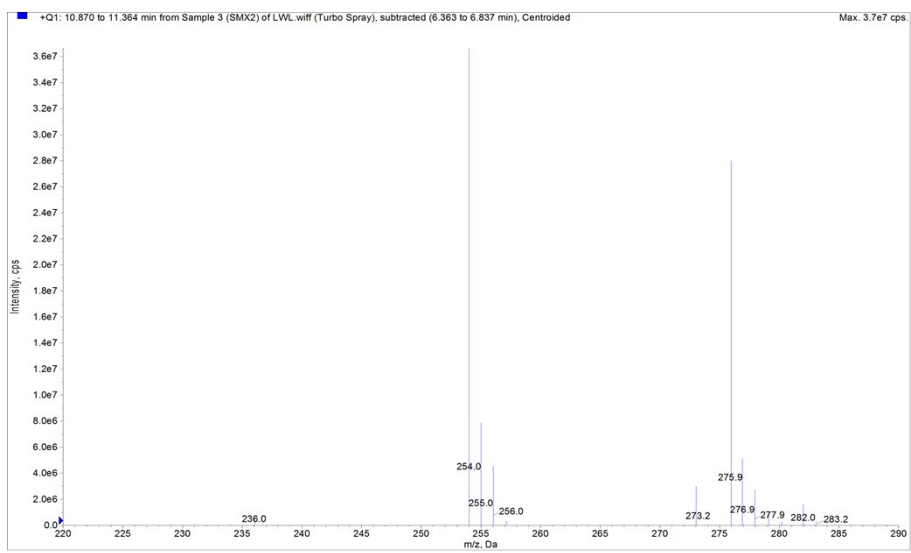



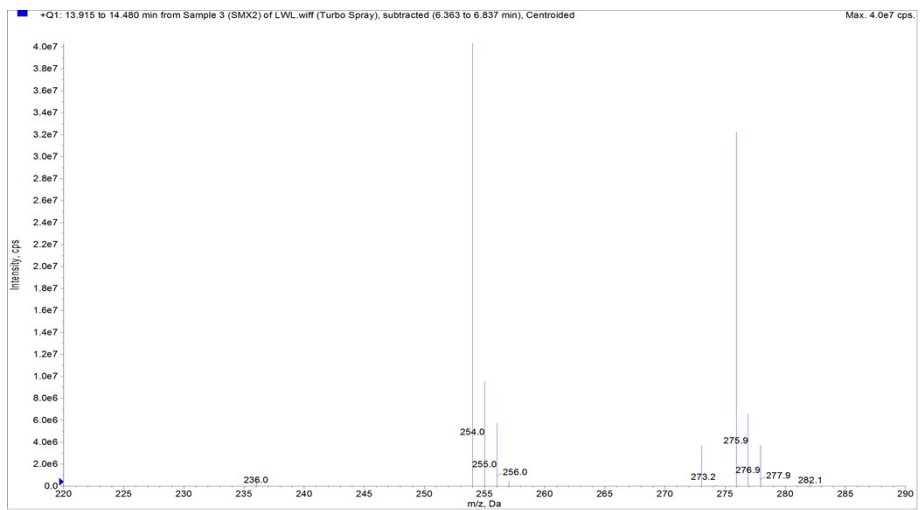

HPLC-MS spectrum analysis of the transformation products of SMA in soil
